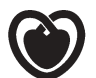

# Uric acid and inflammatory markers

Carmelinda Ruggiero<sup>1,2\*</sup>, Antonio Cherubini<sup>2</sup>, Alessandro Ble<sup>1</sup>, Angelo J.G. Bos<sup>1</sup>, Marcello Maggio<sup>1</sup>, Vishwa D. Dixit<sup>3</sup>, Fulvio Lauretani<sup>4</sup>, Stefania Bandinelli<sup>5</sup>, Umberto Senin<sup>2</sup>, and Luigi Ferrucci<sup>1</sup>

<sup>1</sup>Longitudinal Studies Section, Clinical Research Branch, National Institute on Aging, NIH, Baltimore, MD, USA; <sup>2</sup>Department of Clinical and Experimental Medicine, Institute of Gerontology and Geriatrics, University of Perugia Medical School, Perugia, Italy; <sup>3</sup>Clinical Immunology Section, Laboratory of Immunology, National Institute on Aging, NIH, Baltimore, MD, USA; <sup>4</sup>Tuscany Regional Health Agency, Florence, Italy; and <sup>5</sup>A.S.F. Geriatric Rehabilitation, Florence, Italy

Received 26 August 2005; revised 24 February 2006; accepted 23 March 2006; online publish-ahead-of-print 12 April 2006

## KEYWORDS

Metabolism;  
Inflammation;  
Comorbidity;  
Elderly

**Aims** The role of uric acid (UA) in the process of atherosclerosis and atherotrombosis is controversial. Epidemiological studies have recently shown that UA may be a risk factor for cardiovascular diseases and a negative prognostic marker for mortality in subjects with pre-existing heart failure.

**Methods and results** We evaluate a relationship between UA levels and several inflammatory markers in 957 subjects, free of severe renal failure, from a representative Italian cohort of persons aged 65–95. Plasma levels of UA and white blood cell (WBC) and neutrophil count, C-reactive protein, interleukin-1 receptor antagonist (IL-1ra), interleukin-6 (IL-6), soluble IL-6 receptor (sIL-6r), interleukin-18 (IL-18), and tumor necrosis factor- $\alpha$  (TNF- $\alpha$ ) were measured. Complete information on potential confounders was collected using standard methods. WBC ( $P = 0.0001$ ), neutrophils ( $P < 0.0001$ ), C-reactive protein ( $P < 0.0001$ ), IL-1ra ( $P < 0.0001$ ), IL-6 ( $P = 0.0004$ ), sIL-6r ( $P = 0.002$ ), IL-18 ( $P < 0.0001$ ), TNF- $\alpha$  ( $P = 0.0008$ ), and the percentage of subjects with abnormally high levels of C-reactive protein ( $P = 0.004$ ) and IL-6 ( $P < 0.0001$ ) were significantly higher across UA quintiles. After adjustment for age, sex, behaviour- and disease-related confounders, results were virtually unchanged. In subjects with UA within the normal range, UA was significantly and independently associated with neutrophils count, C-reactive protein, IL-6, IL-1ra, IL-18, and TNF- $\alpha$ , whereas non-significant trends were observed for WBC ( $P = 0.1$ ) and sIL-6r ( $P = 0.2$ ).

**Conclusion** A positive and significant association between UA and several inflammatory markers was found in a large population-based sample of older persons and in a sub-sample of participants with normal UA. Accordingly, the prevalence of abnormally high levels of C-reactive protein and IL-6 increased significantly across UA quintiles.

## Introduction

Uric acid (UA) is a product of the metabolism of purine nucleotides that are the principal constituents of cellular energy stores, such as ATP, and components of DNA and RNA. In most mammals, the liver enzyme uricase converts urate into allantoin, substantially reducing UA plasma levels. Interestingly, the human uricase gene is non-functional,<sup>1</sup> resulting in serum UA levels that are both higher and more fluctuating in humans than in other mammals.<sup>2</sup> Ames hypothesized that mutation of the uricase gene gave humans an evolutionary advantage over other primates due to the UA anti-oxidant properties.<sup>3</sup> Researchers have suggested that the higher UA levels in subjects with cardiovascular diseases (CVD) might be a compensatory response designed to counteract excessive oxidative stress.<sup>4</sup> This theory has a strong rationale in the biochemical characteristics of UA as anti-oxidant and is supported by

pre-clinical studies performed *in vitro* and in experimental animals.<sup>5</sup> However, the role of UA in humans is still uncertain. In fact, although it has been demonstrated that the infusion of UA reduces exercise-induced oxidative stress,<sup>6</sup> it is not known whether persons with hypouricemia experience accelerating aging. In addition, although women have UA levels about 20% lower than men, their average life expectancy is about 7.5 greater.<sup>7</sup>

Although the notion that UA is a risk factor for poor health outcome in the general population<sup>8,9</sup> is not universally acknowledged, a number of studies demonstrated that high UA is an independent risk factor for hypertension,<sup>10</sup> diabetes,<sup>11,12</sup> CVD, and mortality.<sup>13</sup> Even after controlling for associated risk factors, high UA is an independent risk factor for cardiovascular events in patients affected by hypertension,<sup>10</sup> diabetes,<sup>14</sup> pre-existing cerebrovascular,<sup>15</sup> and CVD.<sup>10,16</sup> There is evidence that high UA is a negative prognostic factor in patients with mild-severe heart failure,<sup>17</sup> although the development of hyperuricemia is almost always associated with worsening of renal failure in these patients.<sup>18</sup> Therefore, it is difficult to dissect the

\* Corresponding author. Tel: +1 410 350 3936; fax: +1 410 350 7304.  
E-mail address: ruggieroc@grc.nia.nih.gov

roles played by reduced renal function and high UA in affecting prognosis of these patients. Some evidences suggest that UA may exert a negative effect on CVD by stimulating inflammation, which is clearly involved in the pathogenesis of CVD.<sup>19,20</sup>

A crude correlation between serum C-reactive protein and UA levels has been found in a German population-based survey,<sup>21</sup> and a significant positive correlation between UA and inflammation was found in a small clinical series of heart failure patients.<sup>22,23</sup> Studies have demonstrated that after cellular death or injury, the degradation of nucleotides into UA serves as an endogenous 'danger signal' for the maturation and immunostimulatory action of dendritic cells.<sup>24</sup>

In experimental studies, UA stimulates the release of chemokine monocyte chemoattractant protein-1,<sup>25</sup> and interleukin-1 $\beta$  (IL-1 $\beta$ ), interleukin-6 (IL-6), and tumor necrosis factor- $\alpha$  (TNF- $\alpha$ ) synthesis.<sup>26</sup> In spite of the evidence that UA might contribute to the development of human vascular disease and atherosclerosis through a pro-inflammatory pathway, the relationship between UA and inflammation has been little investigated. We explored a possible association between UA levels and markers of inflammation in a population-based sample of participants in the InCHIANTI study.

## Methods

### Study sample

The present analyses are based on data from the 'Invecchiare in Chianti' (aging in the Chianti area, InCHIANTI) study, an epidemiological study performed in two Italian towns located in the Chianti countryside. The Ethics Committee of the Italian National Institute of Research and care of Aging approved the study protocol. The data collection started in September 1998 and was completed in March 2000.

Using a multistage sampling method, 1453 subjects (age range 20–102; 91.6% of the eligible population) were enrolled in the InCHIANTI study from the two catchment areas.

From the overall samples, we selected 1155 subjects aged 65 and older. After exclusion of 113 subjects without blood UA determination and 85 subjects affected by severe renal failure (creatinine clearance  $\leq 30$  mL/min), the final sample used in our analyses consisted of 957 subjects.

Blood samples were collected in the morning after the participants had been fasting for at least 12 h and after sitting for 15 min. Aliquots of serum and plasma were immediately obtained and stored in a deep freezer at  $-80^{\circ}\text{C}$ , and were subsequently used for the assessment of cytokines. A detailed description of the sampling procedure and data collection method has been previously published.<sup>27</sup>

### Uric acid

UA (mg/dL) was measured using enzymatic-colorimetric methods (Roche Diagnostics, GmbH, Mannheim, Germany). The lower limits of detection were 0.2 mg/dL, range 0.2–25.0 mg/dL, intra-assay and inter-assay coefficients of variation were equal to 0.5 and 1.7%, respectively. Hyperuricemia was defined as a serum urate concentration  $>7.5$  mg/dL (450  $\mu\text{mol/L}$ ) in men and  $>6.2$  mg/dL (372  $\mu\text{mol/L}$ ) in women, in agreement with the normal value provided by our clinical laboratory.

### Inflammatory markers

Serum levels of interleukin-1 (IL-1), interleukin-1 receptor antagonist (IL-1ra), IL-6, interleukin 6 receptor (sIL-6r), interleukin-10

(IL-10), and TNF- $\alpha$  were measured by enzyme linked immunosorbent assay (ELISA) using ultrasensitive commercial kits (Human Ultrasensitive, Biosource International Inc., Camarillo, CA, USA). Serum interleukin-18 (IL-18) was also measured by ELISA using a different commercial kit (Quantikine HS, R&D Systems, Minneapolis, MN, USA). We previously demonstrated that older persons with IL-6 plasma level  $>2.5$  pg/mL are at high risk of mobility-disability.<sup>28</sup>

Serum levels of interleukin-12 (IL-12) and interleukin-8 (IL-8) were determined by multicytokine detection system (Bio-Rad, Hercules, CA, USA) using a Luminex System (Austin, TX, USA) and calculated using BIO-plex software (Bio-Rad).

Assays were done in duplicate for all cytokine measures (except IL-10) and were repeated if the second measure was  $>10\%$  greater or smaller than the first. The average of the two measures was used in the analyses.

Serum C-reactive protein was measured by ELISA high sensitivity test using purified protein and polyclonal anti-C-reactive protein antibodies (Calbiochem, San Diego, CA, USA) with standardization according to the WHO first International Reference Standard. According to the American Heart Association recommendations, persons with C-reactive protein levels  $>3$  mg/L were considered at high cardiovascular risk.<sup>29</sup>

Serum and urinary creatinine levels (mg/dL) were measured by kinetic colorimetric assay based on modified Jaffé method. Erythrocyte-sedimentation rate (ESR) was measured automatically using TEST1 FAST, Alifax-spa. Measurements were expressed in millimeters at the first hour. White blood cells (WBC), lymphocytes, and neutrophils were determined using automatic analyzer Coulter LH 750 (BECKMAN Coulter, Instrumentation Laboratory, Milano), and expressed in  $\text{K}/\mu\text{L}$ . Neutrophils were considered marker of inflammation for a count  $>7.0$   $\text{K}/\mu\text{L}$ .

### Covariates

Pack-years, a measure of smoking exposure that combines intensity and duration, was calculated as (packs smoked per day)  $\times$  (years of smoking) on the basis of self-report. On the basis of responses to multiple questions, physical activity in the previous year was rated as (a) sedentary: inactive or light-intensity physical activity (i.e. walking, light housework)  $<1$  h per week; (b) light physical activity: light-intensity physical activity 2–4 h per week; (c) moderate-high physical activity: light physical activity  $>4$  h per week or moderate physical activity (i.e. brisk walking, playing soccer, gardening) at least 1 to 2 h per week.

Plasma vitamin E ( $\alpha$ -tocopherol) concentrations were measured by reverse-phase high performance liquid chromatography and the measure unit was expressed in  $\mu\text{mol/L}$ .<sup>30</sup>

Average daily alcohol intake ( $<30$  vs. 30 g per day), animal protein intake (g/day) and energy intake (Kcal/day) were asked by interviewers using the European Prospective Investigation into Cancer (EPIC) and Nutrition food frequency questionnaire.<sup>31</sup> The information provided by the questionnaire was transformed into average daily intake of macro- and micronutrients by custom software that uses as a reference the table of food composition for Italian epidemiological studies edited by the European Institute of Oncology.<sup>32</sup>

Major chronic diseases were ascertained according to pre-established criteria that combined information from physician diagnosis, medical records, clinical examination, and blood tests.<sup>33</sup> In the analysis presented here, CVD is defined as the occurrence of angina, or/and myocardial infarction, or/and congestive heart failure, whereas cerebrovascular disease includes stroke and/or transient ischaemic attack. Metabolic syndrome is defined according to the criteria from the National Cholesterol Education Program's Adult Treatment Panel III.<sup>34</sup> Atherosclerosis was defined as bilateral carotid atherosclerotic plaques, and/or any carotid stenosis more severe than 40%, and/or presence of peripheral arterial disease. Carotid atherosclerosis plaques and stenosis were

estimated by Doppler flow ultrasonography. Peripheral artery disease is defined as ankle-brachial index, ABI <0.90 using standardized measurement of the Winsor index.<sup>35</sup> All participants underwent carotid ultrasound and ABI estimation at the initial evaluation.

## Statistical analyses

Variables with symmetric distribution were reported as means and standard deviations (SD). Variables with asymmetric distribution were summarized as medians and interquartile ranges and were used log-transformed in regression analyses and back-transformed for data presentation. The significance level used for two-sided tests was  $P < 0.05$ .

Differences in levels of inflammatory markers across UA quintiles were tested by age- and sex-adjusted linear regression models. Variables not significantly associated with UA in these exploratory analyses were not considered in further analyses. Difference in percentage of abnormal inflammatory markers across the UA quintiles was assessed using  $\chi^2$  tests.

Inflammatory markers that were found significantly associated with UA were expressed as the number of SD from their means and plotted according to UA quintiles.

Differences in inflammatory markers between hyperuricemic and normal subjects were tested by the analysis of variance. General linear models were used to examine the association of UA levels with inflammatory markers independent of age, sex, and other covariates in the whole sample and in subjects with normal levels of UA.

We started the analysis by fitting age- and sex-adjusted models to the whole study population (model 1). Then, we fitted subsequent model adjusted for a progressively increasing number of potential confounders. The model 2 was adjusted for age, sex, serum creatinine, protein and total energy intake, alcohol intake, smoking, physical activity, and vitamin E. The following model was also adjusted for relevant clinical condition such as hypertension, cardiovascular and cerebrovascular diseases, diabetes, metabolic syndrome, cancer, atherosclerosis, chronic renal failure, arthritis, and use of diuretics. The final full adjusted model was also fitted

in a subgroup of participants with normal UA levels (model 4). The linearity of the relationship between UA and inflammatory markers was explored by scatterplots and by looking at average inflammatory markers values according to UA quintiles. In addition, the assumption of constant variance was explored by residual plots. All analyses were performed using the SAS statistical package, version 8.2 (SAS Institute, Cary, NC, USA).

## Results

The main demographic and clinical characteristics of the overall study population and according to sex are presented in *Table 1*. The mean serum UA in the overall population was  $5.1 \pm 1.3$  mg/dL. UA levels tended to be higher at older ages, although the age-trend was not statistically significant. The prevalence of hyperuricemia was 9.3% in the whole population, 12.0% of women and 8.0% of men, respectively ( $P < 0.0001$ ). The prevalence of hypertension, metabolic syndrome, cancer, and arthritis was higher in women than in men, whereas signs of carotid and peripheral atherosclerosis were more prevalent in men than in women.

Mean values and 95% confidence interval of inflammatory markers are reported in *Table 2*, according to UA quintiles. The prevalence of participants with IL-6 >2.5 pg/mL, ( $P = 0.004$ ), and C-reactive protein >3.0 mg/L, ( $P < 0.0001$ ), was progressively and significantly higher from the bottom to the top UA quintiles. The prevalence of abnormal neutrophils count (>7.0 K/ $\mu$ L) tended to be higher in subjects with high UA levels, although this trend was not statistically significant (*Figure 1*).

White blood cells (WBC), neutrophils, C-reactive protein, IL-1ra, IL-6, sIL-6r, IL-18, and TNF- $\alpha$  were progressively and significantly higher from the lowest to the highest UA quintiles, and this significant trend was confirmed after adjustment for age and sex. Lymphocyte count showed a similar

**Table 1** Characteristics of the overall study population

|                                             | All subjects<br>(n = 957) | Women<br>(n = 520) | Men<br>(n = 437) |
|---------------------------------------------|---------------------------|--------------------|------------------|
| Variables (mean $\pm$ SD)                   |                           |                    |                  |
| Age (years)                                 | 74 $\pm$ 7                | 75 $\pm$ 7         | 74 $\pm$ 6       |
| Uric acid (mg/dL)                           | 5.1 $\pm$ 1.3             | 4.8 $\pm$ 1.2      | 5.5 $\pm$ 1.3    |
| Serum creatinine (mg/dL)                    | 0.9 $\pm$ 0.2             | 0.8 $\pm$ 0.1      | 1.0 $\pm$ 0.2    |
| Behaviour related variables (mean $\pm$ SD) |                           |                    |                  |
| Protein intake (g/day)                      | 47.9 $\pm$ 14.8           | 45.4 $\pm$ 14.5    | 50.8 $\pm$ 14.7  |
| Smoking (packs/year)                        | 13 $\pm$ 21               | 3 $\pm$ 9          | 25 $\pm$ 25      |
| Energy intake (Kcal/day)                    | 1944 $\pm$ 555            | 1742 $\pm$ 473     | 2185 $\pm$ 550   |
| Alcohol intake (g/day)                      | 7.6 $\pm$ 4.2             | 7.1 $\pm$ 10.3     | 24.36 $\pm$ 25.1 |
| Physical activity (hours/week)              | 3.3 $\pm$ 0.9             | 3.0 $\pm$ 0.9      | 3.5 $\pm$ 1.0    |
| Vitamin E ( $\mu$ mol/L)                    | 30.2 $\pm$ 8.4            | 31 $\pm$ 4         | 28.8 $\pm$ 8.0   |
| Conditions (n and %)                        |                           |                    |                  |
| Hypertension                                | 634 (66.3)                | 365 (70.5)         | 269 (61.6)       |
| Cardiovascular diseases                     | 271 (28.4)                | 140 (27.0)         | 131 (30.1)       |
| Cerebrovascular diseases                    | 60 (6.4)                  | 26 (5.1)           | 34 (7.9)         |
| Diabetes                                    | 152 (15.8)                | 72 (13.9)          | 80 (18.2)        |
| Metabolic syndrome                          | 219 (23.0)                | 150 (29.0)         | 69 (15.9)        |
| Cancer                                      | 56 (5.9)                  | 38 (7.3)           | 18 (4.1)         |
| Atherosclerosis                             | 182 (20.8)                | 79 (16.6)          | 103 (25.8)       |
| Chronic renal failure                       | 264 (27.6)                | 186 (35.7)         | 78 (17.9)        |
| Knee and hip arthritis                      | 102 (10.7)                | 78 (15.1)          | 24 (5.5)         |
| Use of diuretics                            | 89 (9.2)                  | 52 (9.9)           | 37 (8.5)         |

**Table 2** Linear regression model of uric acid and inflammatory parameters, and their mean levels across the quintiles

| Inflammatory parameters               | Serum uric acid (mg/dL) |                              | Serum uric acid (quintiles) <sup>a</sup> |                                      |                                      |                                      |                                       |
|---------------------------------------|-------------------------|------------------------------|------------------------------------------|--------------------------------------|--------------------------------------|--------------------------------------|---------------------------------------|
|                                       | $\beta \pm SE^b$        | <i>P</i> -value <sup>b</sup> | 1 ( <i>n</i> = 196)<br>1.4–4.0 mg/dL     | 2 ( <i>n</i> = 190)<br>4.1–4.7 mg/dL | 3 ( <i>n</i> = 205)<br>4.8–5.3 mg/dL | 4 ( <i>n</i> = 185)<br>5.4–6.1 mg/dL | 5 ( <i>n</i> = 181)<br>6.2–11.6 mg/dL |
| White blood cells (K/ $\mu$ L)        | 0.18 $\pm$ 0.04         | <0.0001                      | 5.8 (5.5–6.2)                            | 6.0 (5.7–6.3)                        | 6.1 (5.7–6.4)                        | 6.2 (5.9–6.5)                        | 6.5 (6.4–6.6)                         |
| Neutrophils <sup>c</sup> (K/ $\mu$ L) | 0.04 $\pm$ 0.01         | <0.001                       | 3.3 (3.1–3.6)                            | 3.4 (3.2–3.7)                        | 3.5 (3.3–3.8)                        | 3.7 (3.4–3.9)                        | 3.8 (3.7–3.9)                         |
| Lymphocytes <sup>c</sup> (K/ $\mu$ L) | 0.02 $\pm$ 0.01         | 0.069                        | 1.8 (1.6–1.9)                            | 1.7 (1.6–1.9)                        | 1.7 (1.6–1.8)                        | 1.8 (1.6–1.9)                        | 1.9 (1.8–2.0)                         |
| CRP <sup>c</sup> ( $\mu$ g/mL)        | 0.14 $\pm$ 0.03         | <0.0001                      | 2.2 (1.8–2.8)                            | 2.5 (2.0–3.2)                        | 2.6 (2.1–3.2)                        | 3.0 (2.5–3.8)                        | 3.5 (3.4–3.6)                         |
| ESR <sup>c</sup> (mm/h)               | 0.03 $\pm$ 0.02         | 0.087                        | 14.8 (12.6–17.4)                         | 15.1 (12.9–17.7)                     | 13.6 (11.7–15.9)                     | 16.8 (14.4–19.7)                     | 16 (13.6–18.7)                        |
| IL-1 <sup>c</sup> (pg/mL)             | 0.10 $\pm$ 0.08         | 0.185                        | 1.0 (0.5–2.0)                            | 1.1 (0.5–2.1)                        | 1.0 (0.6–2.0)                        | 1.6 (0.8–3.1)                        | 1.0 (0.5–2.0)                         |
| IL-1ra <sup>c</sup> (pg/mL)           | 0.11 $\pm$ 0.01         | <0.0001                      | 112 (100–126)                            | 122 (108–137)                        | 131 (117–147)                        | 143 (127–160)                        | 162 (144–182)                         |
| IL-6 <sup>c</sup> (pg/mL)             | 0.08 $\pm$ 0.02         | 0.0002                       | 1.2 (1.0–1.4)                            | 1.4 (1.2–1.6)                        | 1.4 (1.2–1.7)                        | 1.5 (1.2–1.8)                        | 1.7 (1.5–1.9)                         |
| sIL-6r <sup>c</sup> (ng/ml)           | 0.04 $\pm$ 0.01         | 0.0021                       | 86.0 (77.1–96.0)                         | 87.0 (78.0–96.7)                     | 90.6 (81.6–100.5)                    | 92.0 (82.4–102.0)                    | 102.0 (90.8–115.0)                    |
| TNF- $\alpha$ <sup>c</sup> (pg/mL)    | 0.1 $\pm$ 0.01          | <0.0001                      | 2.2 (1.3–2.7)                            | 2.3 (1.9–2.6)                        | 2.3 (2.0–2.7)                        | 2.7 (2.4–3.2)                        | 2.8 (2.7–3.2)                         |
| IL-8 <sup>c</sup> (pg/mL)             | 0.03 $\pm$ 0.05         | 0.574                        | 5.4 (3.5–8.2)                            | 4.6 (3.0–7.0)                        | 6.2 (4.2–9.2)                        | 5.4 (3.6–8.1)                        | 5.0 (4.5–5.7)                         |
| IL-10 <sup>c</sup> (pg/mL)            | 0.11 $\pm$ 0.04         | 0.007                        | 0.9 (0.6–1.3)                            | 0.8 (0.6–1.1)                        | 1.1 (0.8–1.4)                        | 0.9 (0.7–1.3)                        | 1.1 (0.9–1.2)                         |
| IL-12 <sup>c</sup> (pg/mL)            | 0.10 $\pm$ 0.05         | 0.052                        | 3.1 (2.0–4.9)                            | 3.0 (1.9–4.8)                        | 3.1 (2.1–4.7)                        | 3.8 (2.5–6.0)                        | 3.8 (3.4–4.3)                         |
| IL-18 <sup>c</sup> ( $\mu$ g/mL)      | 0.03 $\pm$ 0.01         | <0.0001                      | 351 (332–382)                            | 355 (331–380)                        | 379 (354–404)                        | 411 (384–440)                        | 399 (355–449)                         |

<sup>a</sup>Data are reported as mean  $\pm$  95% confidence intervals according to uric acid quintiles.

<sup>b</sup> $\beta$  Coefficients  $\pm$  standard errors and *P*-test are from age- and sex-adjusted linear models using UA as a continuous independent variable.

<sup>c</sup>Log-transformed values were then back-transformed for data presentation.

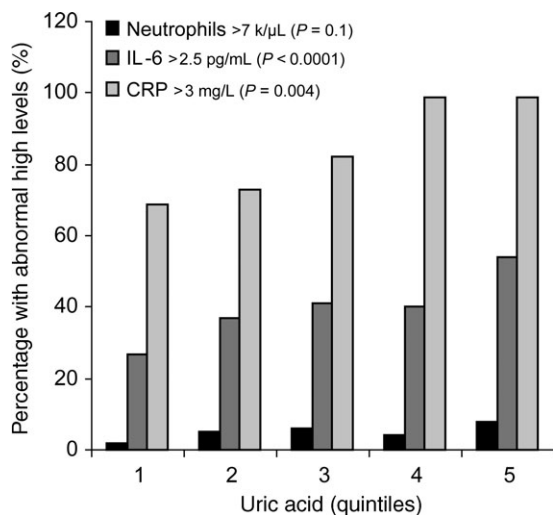

**Figure 1** Prevalence of subjects with high levels of neutrophils, IL-6, and CRP according to uric acid quintiles.

but non-significant trend (*P* = 0.069). Markers of inflammation that were not substantially different according to UA quintiles, (lymphocytes, IL-1, IL-8, IL-10, IL-12, and ESR) were not considered in further analyses.

The levels of inflammatory markers that in previous analysis had been found independently and significantly associated with UA are plotted in *Figure 2* according to UA quintiles. Values are expressed as the number of SD from the population mean, to make them directly comparable. Interestingly, the trajectories of all inflammatory markers considered in this analysis were almost superimposed.

In linear models adjusted for age and sex, UA expressed as a continuous variable was a significant predictor of IL-1ra, IL-6, sIL-6r, IL-18, TNF- $\alpha$ , WBC, neutrophils and C-reactive protein (*Table 3*, model 1). After adjustment for the first set of covariates, the beta coefficients for UA were slightly reduced and, except for sIL-6r, they remained statistically significant (*Table 3*, model 2). After further adjustment for co-morbid conditions, the results were virtually unchanged (*Table 3*, model 3).

In the fully adjusted models fitted in subjects within the normal UA range (2–7.5 mg/dL in men and 2–5.7 mg/dL in women), a significant and positive association was confirmed between UA and neutrophils count, C-reactive protein, IL-6, IL-1ra, IL-18, and TNF- $\alpha$  (*Table 3*, model 4). Similar non-significant trends across the normal UA levels were found for WBC (*P* = 0.09) and sIL-6r (*P* = 0.26).



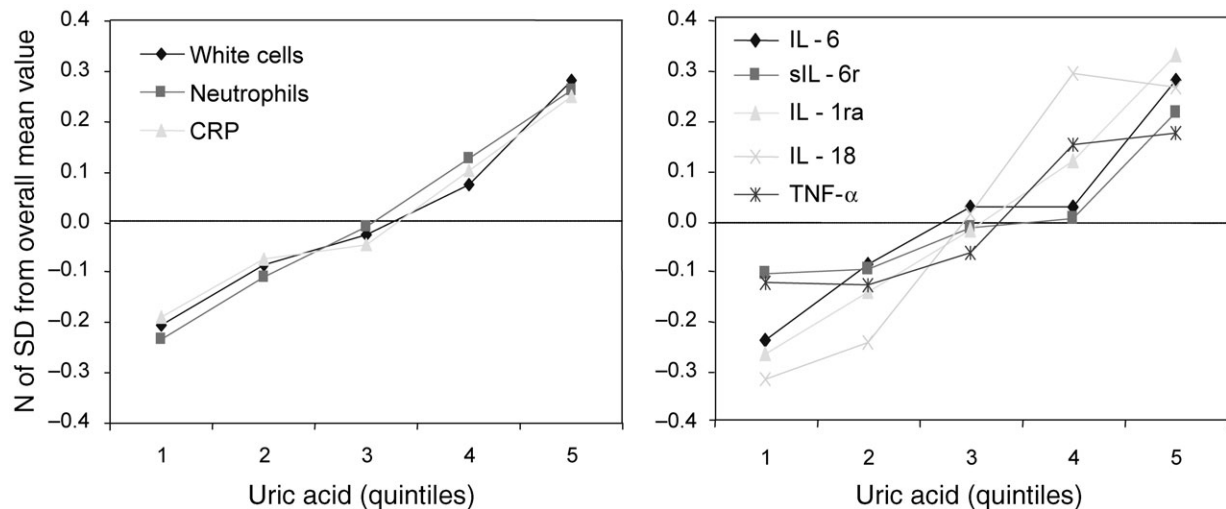

Figure 2 Mean values of inflammatory parameters, (expressed as a number of SD from the population mean), according to uric acid quintiles.

Table 3 Linear regression models on the relationship between uric acid and inflammatory markers

| Overall population      | IL-1ra (pg/mL) <sup>a</sup> | IL-6 (pg/mL) <sup>a</sup> | sIL-6r (ng/mL) <sup>a</sup> | IL-18 (μg/mL) <sup>a</sup> | TNF-α (pg/mL) <sup>a</sup> | White blood cells (K/μL) | Neutrophils (K/μL) <sup>a</sup> | CRP (μg/mL) <sup>a</sup> |
|-------------------------|-----------------------------|---------------------------|-----------------------------|----------------------------|----------------------------|--------------------------|---------------------------------|--------------------------|
| Model 1 <sup>b</sup>    |                             |                           |                             |                            |                            |                          |                                 |                          |
| β ± SE                  | 0.11 ± 0.01                 | 0.08 ± 0.02               | 0.04 ± 0.01                 | 0.03 ± 0.01                | 0.06 ± 0.02                | 0.14 ± 0.02              | 0.04 ± 0.01                     | 0.14 ± 0.03              |
| P                       | <0.0001                     | 0.0002                    | 0.0021                      | <0.0001                    | 0.0008                     | 0.0001                   | <0.0001                         | <0.0001                  |
| Model 2 <sup>b</sup>    |                             |                           |                             |                            |                            |                          |                                 |                          |
| β ± SE                  | 0.12 ± 0.01                 | 0.08 ± 0.02               | 0.02 ± 0.01                 | 0.03 ± 0.01                | 0.07 ± 0.02                | 0.14 ± 0.04              | 0.03 ± 0.01                     | 0.14 ± 0.02              |
| P                       | <0.0001                     | 0.0002                    | 0.15                        | <0.0001                    | 0.0005                     | 0.0002                   | <0.0001                         | <0.0001                  |
| Model 3 <sup>b</sup>    |                             |                           |                             |                            |                            |                          |                                 |                          |
| β ± SE                  | 0.09 ± 0.02                 | 0.05 ± 0.02               | 0.02 ± 0.01                 | 0.02 ± 0.01                | 0.05 ± 0.02                | 0.11 ± 0.04              | 0.03 ± 0.01                     | 0.12 ± 0.03              |
| P                       | <0.0001                     | 0.030                     | 0.27                        | 0.046                      | 0.030                      | 0.027                    | 0.0016                          | 0.0001                   |
| Normo-uricemic subjects |                             |                           |                             |                            |                            |                          |                                 |                          |
| Model 4 <sup>b</sup>    |                             |                           |                             |                            |                            |                          |                                 |                          |
| β ± SE                  | 0.1 ± 0.02                  | 0.06 ± 0.03               | 0.01 ± 0.02                 | 0.03 ± 0.01                | 0.06 ± 0.03                | 0.11 ± 0.06              | 0.03 ± 0.01                     | 0.15 ± 0.04              |
| P                       | <0.0001                     | 0.029                     | 0.5                         | 0.006                      | 0.031                      | 0.085                    | 0.014                           | 0.0003                   |

<sup>a</sup>Variables expressed as log value.

<sup>b</sup>Note that the statistic reported here is from parsimonious models obtained by removing all covariates that were not statistically associated with the outcome. Model 1: adjusted for age and sex. Model 2: adjusted for age, sex, energy intake, protein intake, alcohol intake, smoking, physical activity, vitamin E, serum creatinine. Models 3 and 4: adjusted for all variables in model 2, and hypertension, cardiovascular diseases, cerebrovascular diseases, diabetes, metabolic syndrome, cancer, atherosclerosis, chronic renal failure, arthritis and use of diuretics.

## Discussion

In community-dwelling older persons, randomly selected from the general population, we found a positive and significant association between UA and inflammatory markers, such as WBC, neutrophil count, C-reactive protein, IL-6, IL-1ra, IL-18, and TNF-α. These associations were independent of multiple potential confounders, and in most cases remained statistically significant after restricting the analysis to subjects within the normal UA levels. Moreover, across the UA quintiles, we found a progressive increase in the percentage of subjects with abnormally high levels of IL-6 and CRP, which are considered solid markers of inflammation in clinical practice. These findings suggest that the relationship between UA and inflammatory markers is linear across the entire range of UA and that such a relationship may be clinically relevant even in subjects with UA within the

normal range. However, the nature of such a relationship remains unknown.

Although several studies have found that higher UA is an independent risk factor for CVD and mortality in subjects with cardiovascular risk profile and a negative prognostic factor for survival in heart failure patients, it is still controversial whether high UA is a compensatory attempt to counteract increased oxidative stress, an independent cause of CVD, or just a condition associated with other well-established risk factors such as hypertension, diabetes, and an accelerated clinical evolution of the disease.<sup>13-17</sup>

Allopurinol, a xanthine oxidase (XO) inhibitor, has been shown to improve contractile capacity and myocardial efficiency both in CHF patients and in experimental models.<sup>36-41</sup> Furthermore, in post-myocardial infarction primary angioplasty and aorto-coronary bypass surgery,

allopurinol reduced the oxidative damage related to reperfusion and increased immediate and late left ventricular contractility.<sup>42,43</sup> It has been suggested that these beneficial effects of allopurinol are mediated by XO inhibition or radical scavenger properties or both. However, an additional protective contribution due to the UA reduction may not be excluded.

Some authors suggested that high UA levels may promote the development and the progression of arteriosclerosis,<sup>26</sup> atherosclerosis,<sup>44</sup> or hypertensive organ damage,<sup>45</sup> perhaps by exerting a deleterious effect on endothelial function.<sup>10</sup> Recently, an intrinsic negative effect of UA on the arterial wall has been demonstrated in hyperuricemic subjects,<sup>46</sup> but this finding was not confirmed in healthy and relatively young subjects exposed to UA infusion.<sup>47</sup>

However, building on the finding that excess mortality risk attributable to UA is particularly evident in women,<sup>9,16,48</sup> older persons,<sup>49,50</sup> and subjects with pre-existing CVD,<sup>51,52</sup> and considering that immunosenescence is less pronounced in women than in men<sup>53</sup> and that aging and CVD are both characterized by a proinflammatory state,<sup>19,54,55</sup> we imply that UA may contribute to mortality through proinflammatory mechanisms. Indeed, a significant association between high UA levels and inflammatory markers has been demonstrated in subjects affected by heart failure.<sup>22,23</sup> By demonstrating a positive association between UA and several pro-inflammatory markers our study adds to this evidence. Interestingly, the association between UA and inflammation was found in large sample representative of the general population and was not limited to subjects with hyperuricemia. Actually, a significant linear trend was also detected within the UA 'normal range'. These findings suggest that UA is not only a marker of catabolic rate but also might be actively involved in systemic inflammation, which is an important component of the causal pathway leading to hypertension, vascular diseases, and renal failure.<sup>10</sup>

Given the epidemiological nature of our observations, whether UA is a marker of pro-inflammatory state or causes inflammation 'per se' remains uncertain. However, considerable pre-clinical data support the latter hypothesis. Soluble UA activates the proliferation of rat vascular smooth muscle cells, stimulates the pro-inflammatory response and up-regulates the cyclo-oxygenase-2 activity and vascular C-reactive protein.<sup>10,25,56</sup> Human mononuclear cells exposed to UA increase their production of IL-1 $\beta$ , IL-6, and TNF- $\alpha$ ,<sup>10</sup> whereas neutrophils release proinflammatory proteins.<sup>57</sup>

Overall, these findings support the idea that UA may negatively impact the health status, perhaps by activating a complex vicious cycle involving inflammatory and oxidative related mechanisms. Briefly, in inflammatory related diseases chronic hypoxia causes cellular damage that upregulates the XO enzyme, leading to parallel increase of UA and free radicals production,<sup>58</sup> resulting into endothelial dysfunction.<sup>59</sup> Cytokines (TNF- $\alpha$ , IL-1, and IFN- $\gamma$ ) may increase the UA production through the enhancement of XO activity, the ROS-mediated cell damage,<sup>60</sup> and the promotion of apoptosis.<sup>61</sup> In support to this hypothesis, UA released from cytoplasm into local tissue microenvironments may boost the proinflammatory immune responses, even when its concentration is within normal physiological limits.<sup>24</sup> The pathogenetic relevance of this vicious cycle

in the clinical evolution of CVD is likely to be particularly important in the presence of predisposing conditions, such as old age or high burden of comorbidity.

The main strength of this study is that the InCHIANTI project is especially suited to address the association between UA levels and multiple cytokines, because they were systematically measured in all participants, together with information about major confounders.

Potential limitations of the study should be considered as well. First, because of the cross-sectional nature of our data, a casual pathway from UA to inflammation is suggested but not definitively proven by our findings. Indeed, a possible mechanism of reverse causality is supported by some pre-clinical data and may account for the UA-inflammation-UA vicious cycle described previously.<sup>60</sup> In addition, we could only measure circulating UA, which is only a weak reflection of tissue deposits.

In spite of this limitation, our findings may have significant clinical and speculative implications. The increased level of inflammatory markers as well the progressively higher percentage of subjects with abnormally elevated inflammatory markers across the UA levels suggest that UA might contribute to the proinflammatory state that characterizes many chronic diseases typical in old age. This hypothesis would have to be tested in future clinical studies.

**Conflict of interest:** none declared.

## References

1. Wu XW, Muzny DM, Lee CC, Caskey CT. Two independent mutational events in the loss of urate oxidase during hominoid evolution. *J Mol Evol* 1992;**34**:78–84.
2. Hediger MA, Johnson RJ, Miyazaki H, Endou H. Molecular physiology of urate transport. *Physiology* 2005;**20**:125–133.
3. Ames BN, Cathcart R, Schwiers E, Hochstein P. Uric acid provides an antioxidant defense in humans against oxidant- and radical-caused aging and cancer: a hypothesis. *Proc Natl Acad Sci USA* 1981;**78**:6858–6862.
4. Nieto FJ, Iribarren C, Gross MD, Comstock GW, Cutler RG. Uric acid and serum antioxidant capacity: a reaction to atherosclerosis? *Atherosclerosis* 2000;**148**:131–139.
5. Glantzounis GK, Tsimoyiannis EC, Kappas AM, Galaris DA. Uric acid and oxidative stress. *Curr Pharm Des* 2005;**11**:4145–4151.
6. Waring WS, Convery A, Mishra V, Shenkin A, Webb DJ, Maxwell SR. Uric acid reduces exercise-induced oxidative stress in healthy adults. *Clin Sci* 2003;**105**:425–430.
7. Wyngaarden JB, Kelley WN. Gout and hyperuricemia. New York, Grun and Stratton; 1976.
8. Culleton BF, Larson MG, Kannel WB, Levy D. Serum uric acid and risk for cardiovascular disease and death: the Framingham Heart Study. *Ann Intern Med* 1999;**131**:7–13.
9. Freedman DS, Williamson DF, Gunter EW, Byers T. Relation of serum uric acid to mortality and ischaemic heart disease. The NHANES I Epidemiologic Follow-up Study. *Am J Epidemiol* 1995;**141**:637–644.
10. Johnson RJ, Kang DH, Feig D, Kivlighn S, Kanellis J, Watanabe S, Tuttle KR, Rodriguez-Iturbe B, Herrera-Acosta J, Mazzali M. Is there a pathogenetic role for uric acid in hypertension and cardiovascular and renal disease? *Hypertension* 2003;**41**:1183–1190.
11. Carnethon MR, Fortmann SP, Palaniappan L, Duncan BB, Schmidt MI, Chambless LE. Risk factors for progression to incident hyperinsulinemia: the Atherosclerosis Risk in Communities Study, 1987–1998. *Am J Epidemiol* 2003;**158**:1058–1067.
12. Nakanishi N, Okamoto M, Yoshida H, Matsuo Y, Suzuki K, Tataru K. Serum uric acid and risk for development of hypertension and impaired fasting glucose or Type II diabetes in Japanese male office workers. *Eur J Epidemiol* 2003;**18**:523–530.
13. Niskanen LK, Laaksonen DE, Nyyssonen K, Alftan G, Lakka HM, Lakka TA, Salonen JT. Uric acid level as a risk factor for cardiovascular and all-cause mortality in middle-aged men: a prospective cohort study. *Arch Intern Med* 2004;**164**:1546–1551.

14. Jee SH, Lee SY, Kim MT. Serum uric acid and risk of death from cancer, cardiovascular disease or all causes in men. *Eur J Cardiovasc Prev Rehabil* 2004;11:185-191.
15. Weir CJ, Muir SW, Walters MR, Lees KR. Serum urate as an independent predictor of poor outcome and future vascular events after acute stroke. *Stroke* 2003;34:1951-1956.
16. Fang J, Alderman MH. Serum uric acid and cardiovascular mortality the NHANES I epidemiologic follow-up study, 1971-1992. National Health and Nutrition Examination Survey. *JAMA* 2000;283:2404-2410.
17. Anker SD, Doehner W, Rauchhaus M, Sharma R, Francis D, Knosalla C, Davos CH, Ciccoira M, Shamim W, Kemp M, Segal R, Osterziel KJ, Leyva F, Hetzer R, onikowski P, Coats AJ. Uric acid and survival in chronic heart failure: validation and application in metabolic, functional, and hemodynamic staging. *Circulation* 2003;22:1991-1997.
18. Ochiai ME, Barretto AC, Oliveira MT Jr, Munhoz RT, Morgado PC, Ramires JA. Uric acid renal excretion and renal insufficiency in decompensated severe heart failure. *Eur J Heart Fail* 2005;7:468-474.
19. Hansson GK. Inflammation, atherosclerosis, and coronary artery disease. *N Engl J Med* 2005;21:1685-1695.
20. Festa A, Haffner SM. Inflammation and cardiovascular disease in patients with diabetes: lessons from the Diabetes Control and Complications Trial. *Circulation* 2005;11:2414-2415.
21. Frohlich M, Imhof A, Berg G, Hutchinson WL, Pepys MB, Boeing H, Muche R, Brenner H, Koenig W. Association between C-reactive protein and features of the metabolic syndrome: a population-based study. *Diabetes Care* 2000;23:1835-1839.
22. Leyva F, Anker SD, Godslund IF, Teixeira M, Hellewell PG, Kox WJ, Poole-Wilson PA, Coats AJ. Uric acid in chronic heart failure: a marker of chronic inflammation. *Eur Heart J* 1998;19:1814-1822.
23. Olexa P, Olexova M, Gonsorcik J, Tkac I, Kisel'ova J, Olejnikova M. Uric acid a marker for systemic inflammatory response in patients with congestive heart failure? *Wien Klin Wochenschr* 2002;28:211-215.
24. Shi Y, Evans JE, Rock KL. Molecular identification of a danger signal that alerts the immune system to dying cells. *Nature* 2003;425:516-521.
25. Kanellis J, Watanabe S, Li JH, Kang DH, Li P, Nakagawa T, Wamsley A, Sheikh-Hamad D, Lan HY, Feng L, Johnson RJ. Uric acid stimulates monocyte chemoattractant protein-1 production in vascular smooth muscle cells via mitogen-activated protein kinase and cyclooxygenase-2. *Hypertension* 2003;41:1287-1293.
26. Johnson RJ, Rodriguez-Isturbe B, Kang DH, Feig DI, Herrera-Acosta J. A unifying pathway for essential hypertension. *Am J Hypertens* 2005;18:431-440.
27. Ferrucci L, Bandinelli S, Benvenuti E, Di Iorio A, Macchi C, Harris TB, Guralnik JM. Subsystems contributing to the decline in ability to walk: bridging the gap between epidemiology and geriatric practice in the InCHIANTI study. *J Am Geriatr Soc* 2000;48:1618-1625.
28. Ferrucci L, Harris TB, Guralnik JM, Tracy RP, Corti MC, Cohen HJ, Penninx B, Pahor M, Wallace R, Havlik RJ. Serum IL-6 level and the development of disability in older persons. *J Am Geriatr Soc* 1999;47:639-646.
29. Pearson TA, Mensah GA, Alexander RW, Anderson JL, Cannon RO III, Criqui M, Fadl YY, Fortmann SP, Hong Y, Myers GL, Rifai N, Smith SC Jr, Taubert K, Tracy RP, Vinicor F; Centers for Disease Control and Prevention. American Heart Association Markers of inflammation and cardiovascular disease: application to clinical and public health practice: A statement for health-care professionals from the Centers for Disease Control and Prevention and the American Heart Association. *Circulation* 2003;107:499-511.
30. Cherubini A, Martin A, Andres-Lacueva C, Di Iorio A, Lamponi M, Mecocci P, Bartali B, Corsi A, Senin U, Ferrucci L. Vitamin E levels, cognitive impairment and dementia in older persons: the InCHIANTI study. *Neurobiol Aging* 2005;26:987-994.
31. Pisani P, Faggiano F, Krogh V, Palli D, Vineis P, Berrino F. Relative validity and reproducibility of a food frequency dietary questionnaire for use in the Italian EPIC centres. *Int J Epidemiol* 1997;26:S152-S160.
32. Salvini S. A food composition database for epidemiological studies in Italy. *Cancer* 1997;114:299-300.
33. Guralnik JM, Fried LP, Simonsick EM, Kasper JD, Lafferty ME. *The Women's Health and Aging Study: Health and Social Characteristics of Older Women with Disability*. Bethesda, MD: National Institute of Aging; 1995.
34. Third report of the National Cholesterol Education Program (NCEP) expert panel on detection, evaluation, and treatment of high blood cholesterol in adults (Adult Treatment Panel III). Final report. *Circulation* 2002;106:3143-3421.
35. McDermott MM, Guralnik JM, Albay M, Bandinelli S, Miniati B, Ferrucci L. Impairments of muscles and nerves associated with peripheral arterial disease and their relationship with lower extremity functioning: the InCHIANTI Study. *J Am Geriatr Soc* 2004;52:405-410.
36. Cappola TP, Kass DA, Nelson GS, Berger RD, Rosas GO, Kobeissi ZA, Marban E, Hare JM. Allopurinol improves myocardial efficiency in patients with idiopathic dilated cardiomyopathy. *Circulation* 2001;104:2407-2411.
37. Ukai T, Cheng CP, Tachibana H, Igawa A, Zhang ZS, Cheng HJ, Little WC. Allopurinol enhances the contractile response to dobutamine and exercise in dogs with pacing-induced heart failure. *Circulation* 2001;103:750-755.
38. Perez NG, Gao WD, Marban E. Novel myofilament Ca<sup>2+</sup>-sensitizing property of xanthine oxidase inhibitors. *Circ Res* 1998;83:423-430.
39. Ekelund UE, Harrison RW, Shokek O, Thakkar RN, Tunin RS, Senzaki H, Kass DA, Marban E, Hare JM. Intravenous allopurinol decreases myocardial oxygen consumption and increases mechanical efficiency in dogs with pacing-induced heart failure. *Circ Res* 1999;85:437-445.
40. Doehner W, Schoene N, Rauchhaus M, Leyva-Leon F, Pavitt DV, Reaveley DA, Schuler G, Coats AJ, Anker SD, Hambrecht R. Effects of xanthine oxidase inhibition with allopurinol on endothelial function and peripheral blood flow in hyperuricemic patients with chronic heart failure: results from 2 placebo-controlled studies. *Circulation* 2002;4:2619-2624.
41. Farquharson CA, Butler R, Hill A, Belch JJ, Struthers AD. Allopurinol improves endothelial dysfunction in chronic heart failure. *Circulation* 2002;106:221-226.
42. Guan W, Osanai T, Kamada T, Hanada H, Ishizaka H, Onodera H, Iwasa A, Fujita N, Kudo S, Ohkubo T, Okumura K. Effect of allopurinol pretreatment on free radical generation after primary coronary angioplasty for acute myocardial infarction. *J Cardiovasc Pharmacol* 2003;41:699-705.
43. Gimpel JA, Lahpor JR, van der Molen AJ, Damen J, Hitchcock JF. Reduction of reperfusion injury of human myocardium by allopurinol: a clinical study. *Free Radic Biol Med* 1995;19:251-255.
44. Ishizaka N, Ishizaka Y, Toda E, Nagai R, Yamakado M. Association between serum uric acid, metabolic syndrome, and carotid atherosclerosis in Japanese individuals. *Arterioscler Thromb Vasc Biol* 2005;25:1038-1044.
45. Viazzi F, Parodi D, Leoncini G, Parodi A, Falqui V, Ratto E, Vettoretti S, Bezante GP, Del Sette M, Deferrari G, Pontremoli R. Serum uric acid and target organ damage in primary hypertension. *Hypertension* 2005;45:991-996.
46. Mercurio G, Vitale C, Cerquetani E, Zoncu S, Deidda M, Fini M, Rosano GM. Effect of hyperuricemia upon endothelial function in patients at increased cardiovascular risk. *Am J Cardiol* 2004;94:932-935.
47. Waring WS, Adwani SH, Breukels O, Webb DJ, Maxwell SR. Hyperuricaemia does not impair cardiovascular function in healthy adults. *Heart* 2004;90:155-159.
48. Levine W, Dyer AR, Shekelle RB, Schoenberger JA, Stamler J. Serum uric acid and 11.5-year mortality of middle-aged women: findings of the Chicago Heart Association Detection Project in Industry. *J Clin Epidemiol* 1989;42:257-267.
49. Goldberg RJ, Burchfiel CM, Benfante R, Chiu D, Reed DM, Yano K. Lifestyle and biologic factors associated with atherosclerotic disease in middle-aged men. 20-year findings from the Honolulu Heart Program. *Arch Intern Med* 1995;155:686-694.
50. Franse LV, Pahor M, Di Bari M, Shorr RI, Wan JY, Somes GW, Applegate WB. Serum uric acid, diuretic treatment and risk of cardiovascular events in the Systolic Hypertension in the Elderly Program (SHEP). *J Hypertens* 2000;18:1149-1154.
51. Alderman MH. Uric acid and cardiovascular risk. *Curr Opin Pharmacol* 2002;2:126-130.
52. Langford HG, Blaufox MD, Borhani NO, Curb JD, Molteni A, Schneider KA, Pressel S. Is thiazide-produced uric acid elevation harmful? Analysis of data from the Hypertension Detection and Follow-up Program. *Arch Intern Med* 1987;147:645-649.
53. Oyeyinka GO. Age and sex differences in immunocompetence. *Gerontology* 1984;30:188-195.
54. Johnson RJ, Kivlighn SD, Kim YG, Suga S, Fogo AB. Reappraisal of the pathogenesis and consequences of hyperuricemia in hypertension, cardiovascular disease, and renal disease. *Am J Kidney Dis* 1999;33:225-234.
55. Ferrucci L, Corsi A, Lauretani F, Bandinelli S, Bartali B, Taub DD, Guralnik JM, Longo DL. The origins of age-related proinflammatory state. *Blood* 2005;105:2294-2299.
56. Watanabe S, Kang DH, Feng L, Nakagawa T, Kanellis J, Lan H, Mazzali M, Johnson RJ. Uric acid, hominoid evolution, and the pathogenesis of salt-sensitivity. *Hypertension* 2002;40:355-360.
57. Ryckman C, Gilbert C, de Medicis R, Lussier A, Vandal K, Tessier PA. Monosodium urate monohydrate crystals induce the release of the proinflammatory protein S100A8/A9 from neutrophils. *J Leukoc Biol* 2004;76:433-440.

58. Berry CE, Hare JM. Xanthine oxidoreductase and cardiovascular disease: molecular mechanisms and pathophysiological implications. *J Physiol* 2004;**16**:589–606.
59. Khosla UM, Zharikov S, Finch JL, Nakagawa T, Roncal C, Mu W, Krotova K, Block ER, Prabhakar S, Johnson RJ. Hyperuricemia induces endothelial dysfunction. *Kidney Int* 2005;**67**:1739–1742.
60. Komaki Y, Sugiura H, Koarai A, Tomaki M, Ogawa H, Akita T, Hattori T, Ichinose M. Cytokine-mediated xanthine oxidase upregulation in chronic obstructive pulmonary disease's airways. *Pulm Pharmacol Ther* 2005;**18**:297–302.
61. Marsoni S, Damia G. Molecular targeting: new therapeutic strategies to improve tumour apoptosis. *Ann Oncol* 2004;**15**:229–231.
